# Supplementary material for: Urchin-like ZnO microspheres synthesized by thermal decomposition of hydrozincite as a copper catalyst promoter for the Rochow reaction
Source: Royal Society of Chemistry journal article supplement (doi:10.1039/c2ra01022d), 2012-01-01
Supplement: c2ra01022d.pdf [file c2ra01022d.pdf]

## Supporting Information

### **Urchin-like ZnO microspheres synthesized by thermal decomposition of hydrozincite as a copper catalyst promoter for Rochow reaction**

Min Chen,<sup>a,b</sup> Yingli Wang,<sup>b</sup> Lianying Song,<sup>b</sup> Poernomo Gunawan,<sup>c</sup>

Ziyi Zhong,<sup>c</sup> Xilin She<sup>\*a</sup> and Fabing Su<sup>\*b</sup>

<sup>a</sup> *College of Chemical and Environmental Engineering, Qingdao University, Qingdao, Shandong Province, China 266071,*

<sup>b</sup> *State Key Laboratory of Multiphase Complex Systems, Institute of Process Engineering, Chinese Academy of Sciences, Beijing, China 100190,*

<sup>c</sup> *Institute of Chemical Engineering and Sciences, A\*star, 1 Pesek Road, Jurong Island, Singapore 627833*

\*To whom correspondence should be addressed. E-mail address: [fbsu@mail.ipe.ac.cn](mailto:fbsu@mail.ipe.ac.cn)(F.Su),  
[xlshe@126.com](mailto:xlshe@126.com) (X. She)

**Table S1** Surface area and the average crystallite size of ZnO samples

| Sample         | Surface area<br>(m <sup>2</sup> /g) | Average crystal size<br>(nm) | Particle Size<br>(μm) |
|----------------|-------------------------------------|------------------------------|-----------------------|
| S1             | 16.4                                | 21                           | 3 - 8                 |
| S2             | 26.2                                | 23                           | 3 - 8                 |
| S3             | 30.7                                | 23                           | 3 - 8                 |
| S4             | 25.5                                | 25                           | 3 - 8                 |
| S5             | 18.9                                | 28                           | 3 - 8                 |
| S6             | 21.5                                | 28                           | 3 - 8                 |
| S7             | 26.2                                | 23                           | 3 - 8                 |
| S8             | 27.7                                | 23                           | 3 - 8                 |
| S9             | 22.2                                | 28                           | 3 - 8                 |
| S10            | 21.5                                | 28                           | 3 - 8                 |
| S11            | 27.9                                | 21                           | 3 - 8                 |
| S12            | 28.5                                | 23                           | 3 - 8                 |
| Commercial Zn  | 0.6                                 | 43                           | 3 - 10                |
| Commercial ZnO | 2.1                                 | 42                           | 0.2 - 1               |

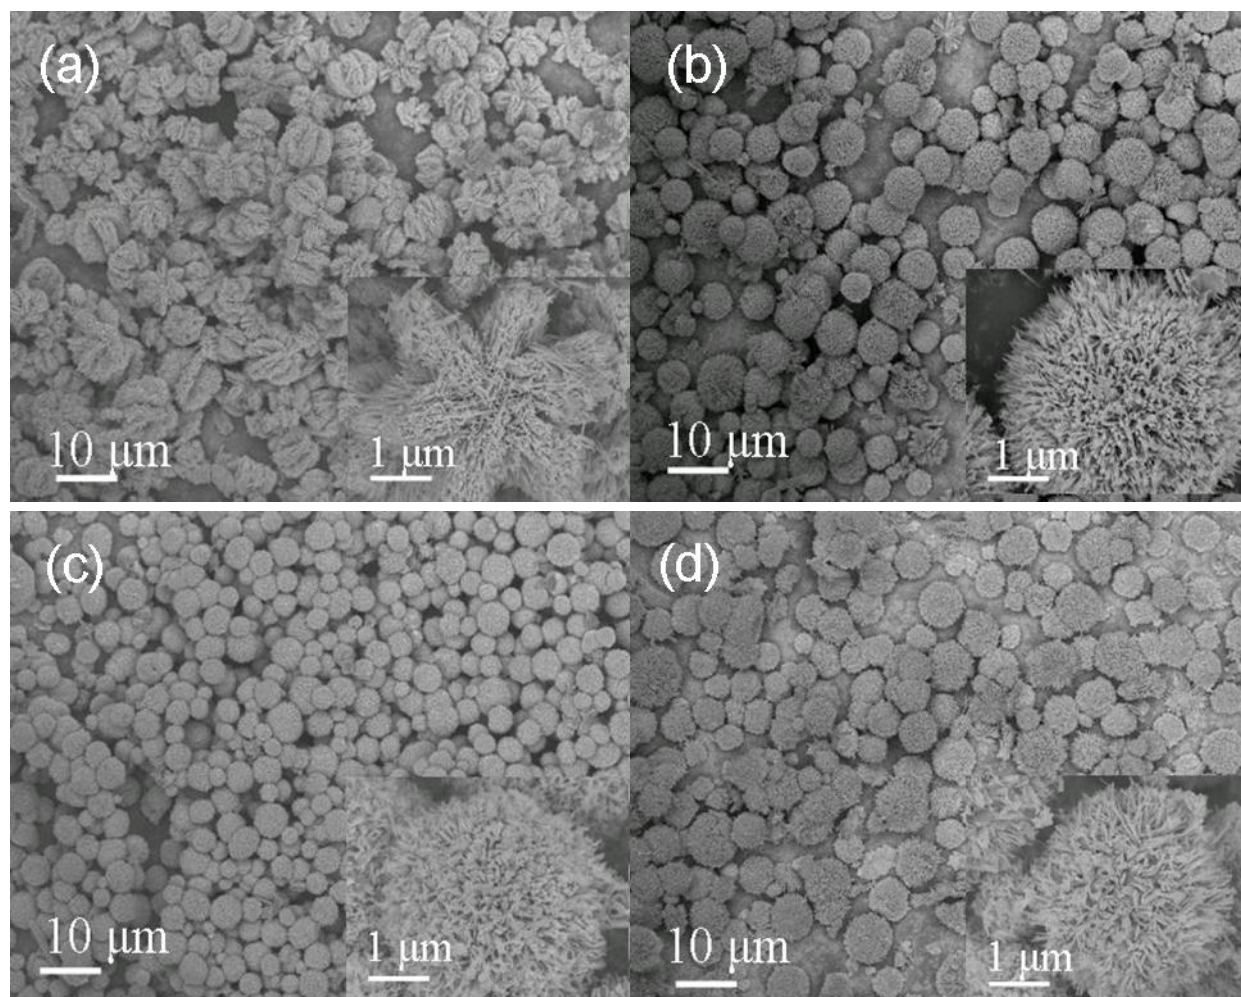

**Fig. S1** SEM images of ZnO samples synthesized with different zinc nitrate concentrations: (a) 0.025 M (S1), (b) 0.100 M (S2), (c) 0.150 M (S3) and (d) 0.250 M (S4).

The urchin-like ZnO microspheres with a good crystallinity can be obtained with zinc nitrate concentration of 0.150 M.

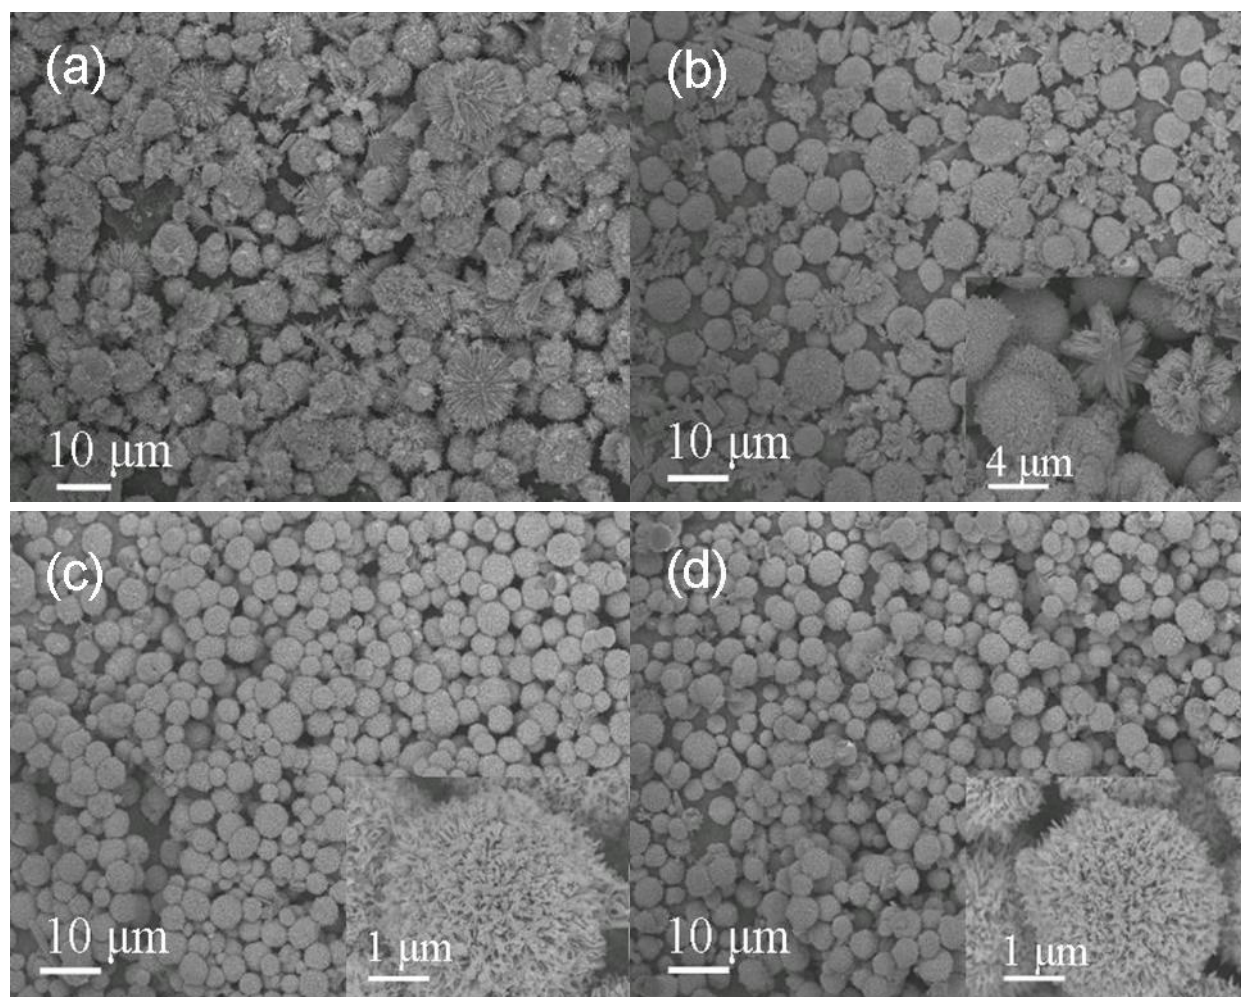

**Fig. S2** SEM images of ZnO samples obtained with different PEG amounts: (a) 0 g (S5), (b) 3.0 g (S6), (c) 6.0 g (S3) and (d) 12 g (S7).

The urchin-like ZnO microspheres can be synthesized with a proper amount of PEG (6.0 – 12.0 g).



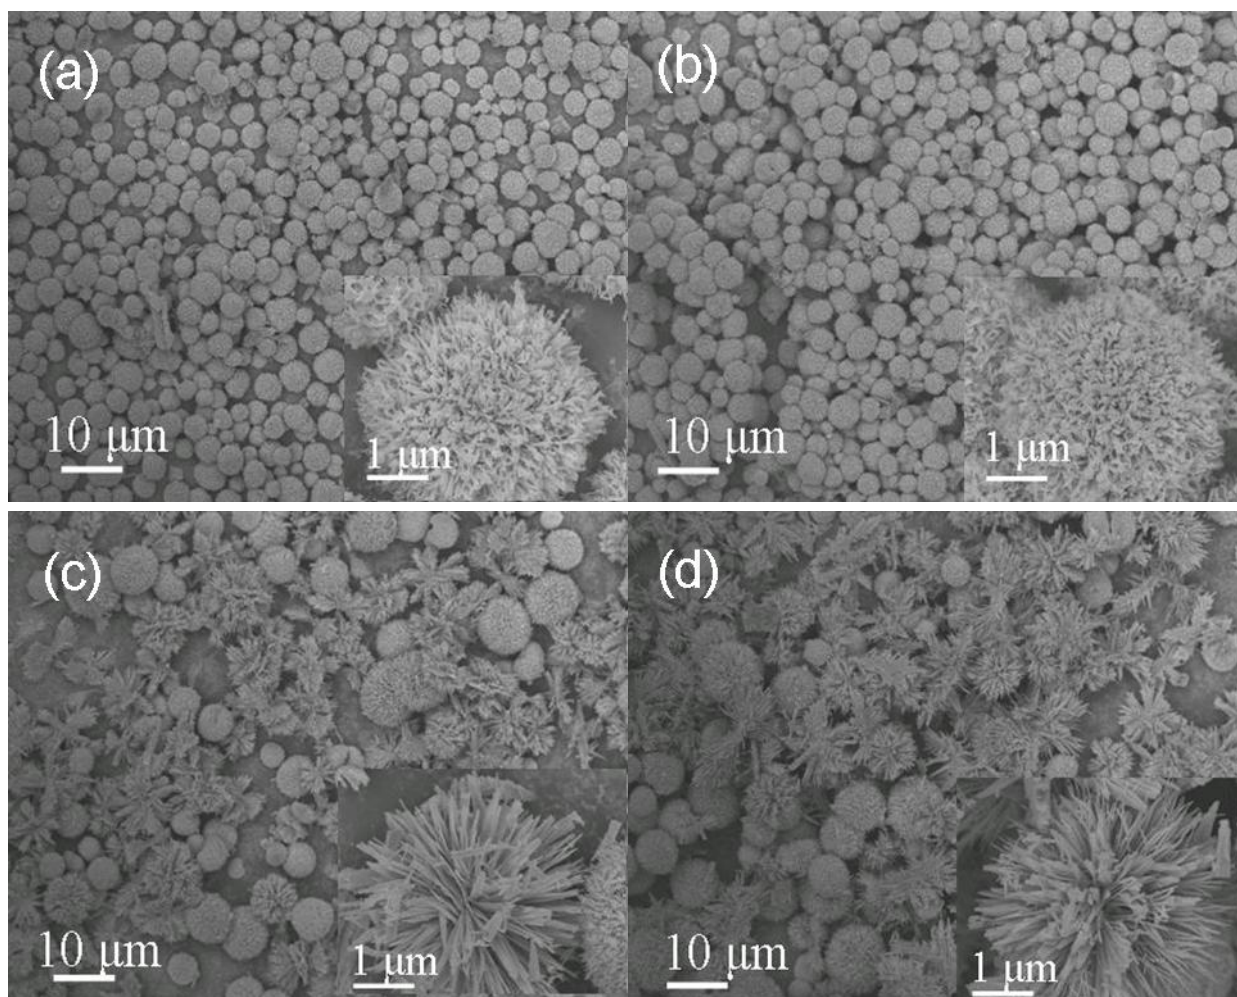

**Fig. S3** SEM images of ZnO obtained at different reaction times: (a) 0.25 h (S8), (b) 0.50 h (S3), (c) 1.00 h (S9) and (d) 3.00 h (S10).

The urchin-like ZnO microspheres can be obtained with the reaction time of 0.50 h.

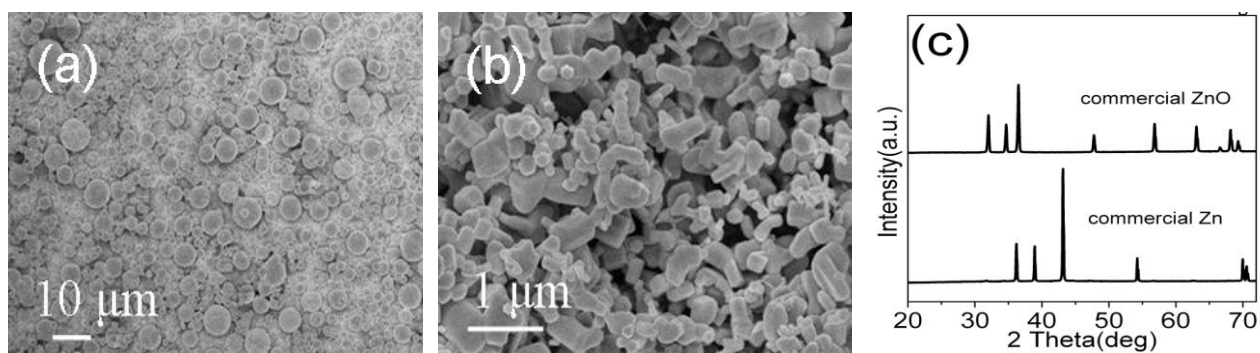

**Fig. S4** SEM images of commercial Zn microspheres (a) and ZnO particles (b), as well as XRD patterns of commercial Zn and ZnO (c).
